# Supplementary material for: Evidence of friction reduction in laterally graded materials
Source: publisher site journal article supplement (doi:10.3762/bjnano.9.229), 2018-09-13

# **Supporting Information**

## **for**

### **Evidence of friction reduction in laterally graded materials**

Roberto Guarino<sup>1</sup>, Gianluca Costagliola<sup>2</sup>, Federico Bosia<sup>2</sup>, and Nicola Maria Pugno<sup>1,3,4,\*</sup>

Address: <sup>1</sup>Laboratory of Bio-Inspired & Graphene Nanomechanics, Department of Civil, Environmental and Mechanical Engineering, University of Trento, Via Mesiano 77, 38123 Trento, Italy, <sup>2</sup>Department of Physics and Nanostructured Interfaces and Surfaces Centre, University of Torino, Via Pietro Giuria 1, 10125 Torino, Italy, <sup>3</sup>Ket Lab, Edoardo Amaldi Foundation, Italian Space Agency, Via del Politecnico snc, 00133 Rome, Italy and <sup>4</sup>School of Engineering and Materials Science, Queen Mary University of London, Mile End Road, E1-4NS London, United Kingdom

\* Corresponding author

Email: Nicola Maria Pugno - nicola.pugno@unitn.it

# Effect of the finite-element type on the surface stress distributions

Normalised normal and tangential stresses with respect to the applied pressure  $p$  as function of the dimensionless coordinate  $x/L$ . C3D8R: 8-node brick with reduced integration, C3D8I: 8-node brick with 8 points of integration and incompatible modes.

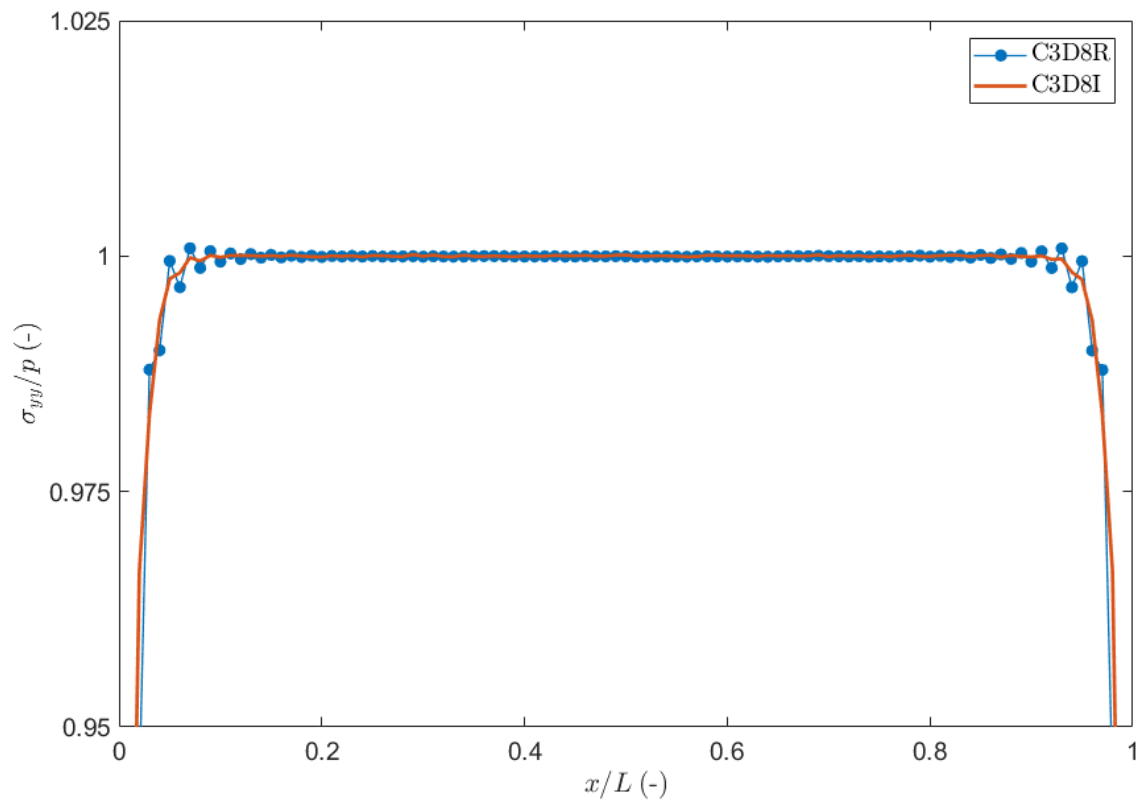

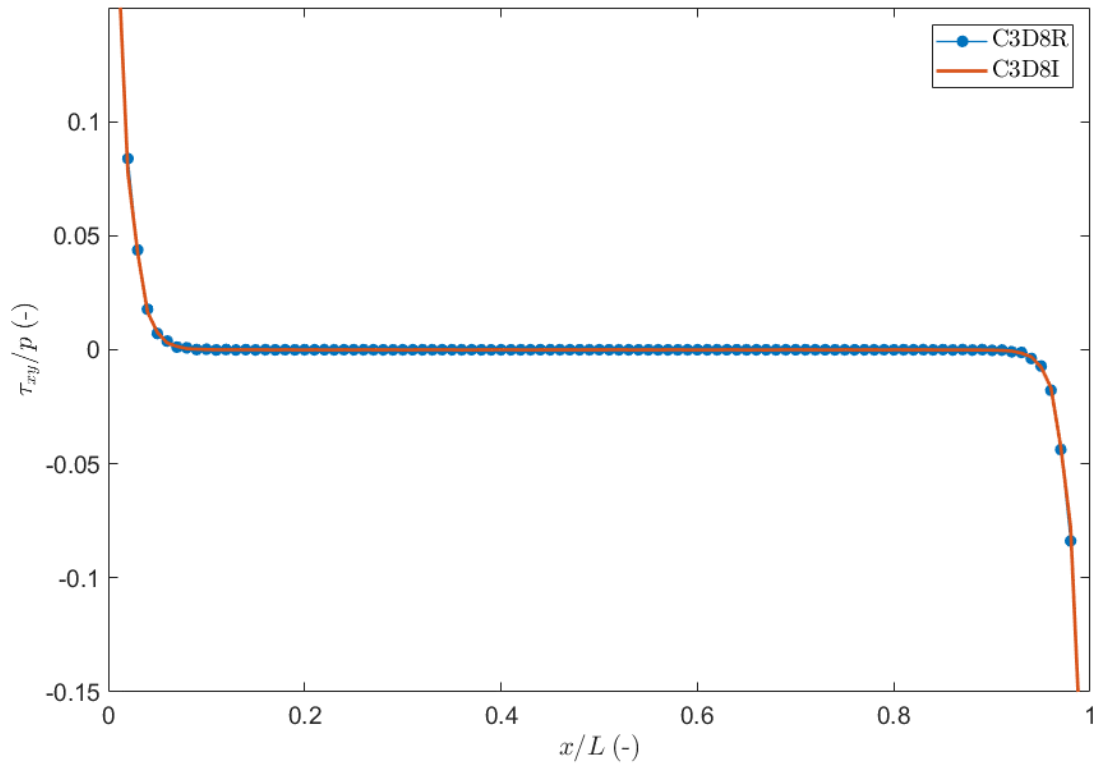

Supplement: Additional file 5 [file 2190-4286-9-229-S5.pdf]
