# Supplementary material for: Evidence of friction reduction in laterally graded materials
Source: publisher site journal article supplement (doi:10.3762/bjnano.9.229), 2018-09-13
Supplement: Additional file 6 [file 2190-4286-9-229-S6.pdf]

# **Supporting Information**

## **for**

### **Evidence of friction reduction in laterally graded materials**

Roberto Guarino<sup>1</sup>, Gianluca Costagliola<sup>2</sup>, Federico Bosia<sup>2</sup>, and Nicola Maria Pugno<sup>1,3,4,\*</sup>

Address: <sup>1</sup>Laboratory of Bio-Inspired & Graphene Nanomechanics, Department of Civil, Environmental and Mechanical Engineering, University of Trento, Via Mesiano 77, 38123 Trento, Italy, <sup>2</sup>Department of Physics and Nanostructured Interfaces and Surfaces Centre, University of Torino, Via Pietro Giuria 1, 10125 Torino, Italy, <sup>3</sup>Ket Lab, Edoardo Amaldi Foundation, Italian Space Agency, Via del Politecnico snc, 00133 Rome, Italy and <sup>4</sup>School of Engineering and Materials Science, Queen Mary University of London, Mile End Road, E1-4NS London, United Kingdom

\* Corresponding author

Email: Nicola Maria Pugno - nicola.pugno@unitn.it

## Computed values of the global static coefficients of friction

Tables reporting the computed absolute values of the global static friction coefficient  $\mu_s$ , as function of  $\Delta$  and obtained through SBM and FEM, for the case of gradients in the local friction coefficients and gradients in the material Young's modulus.

| <b>Gradients in the local coefficients of friction</b> |        |        |
|--------------------------------------------------------|--------|--------|
| $\Delta$                                               | SBM    | FEM    |
| -0.4                                                   | 0.6198 | 0.7080 |
| -0.3                                                   | 0.6501 | 0.7128 |
| -0.2                                                   | 0.7458 | 0.7321 |
| -0.1                                                   | 0.8346 | 0.8237 |
| 0.0<br>(reference case)                                | 0.9124 | 0.9124 |
| 0.1                                                    | 0.8336 | 0.8640 |
| 0.2                                                    | 0.7442 | 0.7776 |
| 0.3                                                    | 0.6491 | 0.6835 |
| 0.4                                                    | 0.6212 | 0.6746 |

| <b>Gradients in the material Young's modulus</b> |        |        |
|--------------------------------------------------|--------|--------|
| $\Delta$                                         | SBM    | FEM    |
| -0.4                                             | 0.6725 | 0.6844 |
| -0.3                                             | 0.7236 | 0.7197 |
| -0.2                                             | 0.7789 | 0.7756 |
| -0.1                                             | 0.8509 | 0.8451 |
| 0.0<br>(reference case)                          | 0.9124 | 0.9124 |
| 0.1                                              | 0.8494 | 0.8325 |
| 0.2                                              | 0.7808 | 0.7667 |
| 0.3                                              | 0.7251 | 0.7500 |
| 0.4                                              | 0.6754 | 0.7278 |
